# Supplementary material for: TheCaenorhabditis elegans spe-38gene encodes a novel four-pass integral membrane protein required for sperm function at fertilization
Source: Oxford University Press journal article supplement (doi:10.1242/dev.01868), 2005-06-01
Supplement: dev01868supptable.pdf [file dev01868supptable.pdf]

**Table S1. Genetic mapping of the *spe-38* gene**

| <b>Three-factor mapping</b>                                                              |                   |                               |                                        |                            |                         |
|------------------------------------------------------------------------------------------|-------------------|-------------------------------|----------------------------------------|----------------------------|-------------------------|
| Genotype                                                                                 |                   | Recombinants                  |                                        | Segregation*               |                         |
| <i>spe-38/dpy-5 unc-75</i>                                                               |                   | Dpy Non-Unc<br>Unc Non-Dpy    |                                        | 26/38 Spe<br>10/37 Spe     |                         |
| <b>SNP mapping</b>                                                                       |                   |                               |                                        |                            |                         |
| Type <sup>†</sup>                                                                        | Name <sup>‡</sup> | Genomic position <sup>§</sup> | Nucleotide change N2 to H <sup>¶</sup> | Recombinants**             | Marker N2 <sup>††</sup> |
| SNIP SNP                                                                                 | ZC247             | 1:10246168                    | A to T                                 | Dpy Non-Spe<br>Unc Non-Spe | 8/22<br>1/13            |
| SNIP SNP                                                                                 | C3E57             | 1:1084422                     | C to T                                 | Dpy Non-Spe<br>Unc Non-Spe | 4/22<br>0/13            |
| SNIP SNP                                                                                 | F49D11            | 1:10932370                    | G to A                                 | Dpy Non-Spe<br>Unc Non-Spe | 6/6<br>0/1              |
| Sequence SNP                                                                             | Y52B11A SNP1      | 1:10949940                    | T to G                                 | Dpy Non-Spe<br>Unc Non-Spe | 1/4<br>0/1              |
| Sequence SNP                                                                             | Y52B11A SNP2      | 1:10970913                    | C to T                                 | Dpy Non-Spe<br>Unc Non-Spe | 0/1<br>0/1              |
| Sequence SNP                                                                             | Y52B11A SNP3      | 1:11054394                    | T to G                                 | Dpy Non-Spe<br>Unc Non-Spe | 0/4<br>1/1              |
| SNIP SNP                                                                                 | W02B9             | 1:11085342                    | T to A                                 | Dpy Non-Spe<br>Unc Non-Spe | 0/6<br>1/1              |
| SNIP SNP                                                                                 | ZK39              | 1:11170085                    | C to A                                 | Dpy Non-Spe<br>Unc Non-Spe | 2/22<br>1/13            |
| <b>Complementation tests to sterile mutants in the <i>spe-38</i> region<sup>‡‡</sup></b> |                   |                               |                                        |                            |                         |
| Gene                                                                                     |                   |                               |                                        | Result                     |                         |
| <i>stu-10</i>                                                                            |                   |                               |                                        | Complements                |                         |
| <i>sqv-5</i>                                                                             |                   |                               |                                        | Complements                |                         |
| <i>spe-9</i>                                                                             |                   |                               |                                        | Complements                |                         |

\*Recombinants that segregated sterile progeny in the next generation were scored as Spe.

<sup>†</sup>Single Nucleotide Polymorphisms (SNPs). SNIP SNPs can be detected with restriction digest. Sequence SNPs can only be detected by DNA sequencing.

<sup>‡</sup>SNPs are named after the cosmid clone or yeast artificial chromosome (YAC) clone that corresponds to their location in the genome. When more than one SNP is in sequence corresponding to the same clone they are given additional numeric designations.

<sup>§</sup>Genomic position of SNPs are indicated as follows: chromosome:nucleotide position. SNPs were chosen or identified as the location of *spe-38* was progressively narrowed.

<sup>¶</sup>Sequence change from *C. elegans* strain N2 (Bristol, England) to CB4856 (H, Hawaii).

\*\*Recombinants were derived from *dpy-5 spe-38* (N2) / + + (H) or *spe-38 unc-75* (N2) / + + (H) hermaphrodites.

<sup>††</sup>The number of recombinants that had N2 sequence for the indicated SNP / total number of recombinant lines examined.

<sup>‡‡</sup>In order to determine whether the *eb44* mutation was an allele of *stu-10*, *sqv-5* or *spe-9*, complementation tests were conducted. Heterozygous *stu-10*, *sqv-5* or *spe-9* males were crossed to homozygous *spe-38* hermaphrodites. If no sterile progeny were detected in the F1 generation then the gene was considered to complement *eb44*.
